# Supplementary material
Source: PubMed Central journal article supplement (PMC3638080)
Supplement: NIHMS429147-supplement-supplement_1.pdf [file NIHMS429147-supplement-supplement_1.pdf]

**Supplementary Table 1**

Correlations between Child Disability Composite Indices

| Composite | Country                  | Cognitive | Language | Sensory |
|-----------|--------------------------|-----------|----------|---------|
| Language  |                          |           |          |         |
|           | <b>High HDI</b>          |           |          |         |
|           | Montenegro               | -.65      |          |         |
|           | Serbia                   | -.44      |          |         |
|           | Macedonia                | -.64      |          |         |
|           | Albania                  | -.39      |          |         |
|           | Bosnia and Herzegovina   | n/a       |          |         |
|           | <b>Medium HDI</b>        |           |          |         |
|           | Thailand                 | -.43      |          |         |
|           | Belize                   | -.62      |          |         |
|           | Jamaica                  | -.71      |          |         |
|           | Mongolia                 | -.61      |          |         |
|           | Uzbekistan               | -.61      |          |         |
|           | Yemen                    | -.56      |          |         |
|           | Ghana                    | -.68      |          |         |
|           | Bangladesh               | -.65      |          |         |
|           | <b>Low HDI</b>           |           |          |         |
|           | Central African Republic | -.48      |          |         |
|           | Sierra Leone             | -.54      |          |         |
|           | <b>HDI N/A</b>           |           |          |         |
|           | Iraq                     | -.50      |          |         |
|           | <b>Total</b>             | -.57      |          |         |
| Sensory   |                          |           |          |         |
|           | <b>High HDI</b>          |           |          |         |
|           | Montenegro               | -1.00     | -1.00    |         |
|           | Serbia                   | -.79      | -.79     |         |
|           | Macedonia                | -.86      | -.73     |         |
|           | Albania                  | -.92      | -.88     |         |
|           | Bosnia and Herzegovina   | N/A       | -.82     |         |
|           | <b>Medium HDI</b>        |           |          |         |
|           | Thailand                 | -.71      | -.69     |         |
|           | Belize                   | -.85      | -.68     |         |
|           | Jamaica                  | -.77      | -.80     |         |
|           | Mongolia                 | -.75      | -.73     |         |
|           | Uzbekistan               | -.87      | -.69     |         |
|           | Yemen                    | -.77      | -.67     |         |
|           | Ghana                    | -.82      | -.78     |         |
|           | Bangladesh               | -.83      | -.84     |         |
|           | <b>Low HDI</b>           |           |          |         |
|           | Central African Republic | -.80      | -.64     |         |
|           | Sierra Leone             | -.88      | -.68     |         |
|           | <b>HDI N/A</b>           |           |          |         |
|           | Iraq                     | -.80      | -.72     |         |
|           | <b>Total</b>             | -.83      | -.76     |         |

**Supplementary Table 1 continued**

Correlations between Child Disability Composite Indices

| Composite         | Country                  | Cognitive | Language | Sensory |
|-------------------|--------------------------|-----------|----------|---------|
| <b>Motor</b>      |                          |           |          |         |
| <b>High HDI</b>   |                          |           |          |         |
|                   | Montenegro               | -1.00     | -.89     | -1.00   |
|                   | Serbia                   | -.56      | -.64     | -.69    |
|                   | Macedonia                | -.77      | -.74     | -.78    |
|                   | Albania                  | -.75      | -.70     | -.73    |
|                   | Bosnia and Herzegovina   | N/A       | -.74     | -.76    |
| <b>Medium HDI</b> |                          |           |          |         |
|                   | Thailand                 | -.68      | -.69     | -.58    |
|                   | Belize                   | -.77      | -.70     | -.44    |
|                   | Jamaica                  | -.80      | -.79     | -.78    |
|                   | Mongolia                 | -.69      | -.74     | -.81    |
|                   | Uzbekistan               | -.78      | -.81     | -.80    |
|                   | Yemen                    | -.76      | -.74     | -.78    |
|                   | Ghana                    | -.80      | -.79     | -.84    |
|                   | Bangladesh               | -.70      | -.82     | -.81    |
| <b>Low HDI</b>    |                          |           |          |         |
|                   | Central African Republic | -.79      | -.66     | -.74    |
|                   | Sierra Leone             | -.86      | -.66     | -.81    |
| <b>HDI N/A</b>    |                          |           |          |         |
|                   | Iraq                     | -.72      | -.73     | -.76    |
|                   | <b>Total</b>             | -.80      | -.80     | -.79    |

Note. Phi coefficients filtered by families reporting that the child had at least 1 of the 2 variables in each pairing.

n/a = data not available.

All  $ps < .001$ .
